# Supplementary material
Source: Springer Nature journal article supplement (https://www.springermedizin.de/resource/supplementary/12911_2013_794_MOESM5_ESM.pdf/9526654)

# Deleting Records

Using Pair Information

Group 1

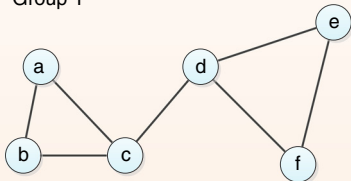

Without Pair Information

Group 1

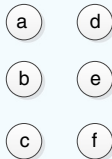

Record 'd' is deleted.

Group 2

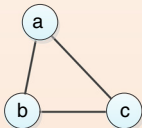

Group 3

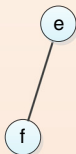

Group 1

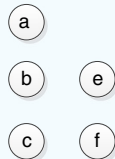

Supplement: MOESM5 [file 9526654]
